# Supplementary material for: Prevalence and Antimicrobial Susceptibility Pattern of Neisseria Gonorrhoeae from Selected Public Health Centers, Addis Ababa, Ethiopia.
Source: Research Square preprint supplement (doi:10.21203/rs.3.rs-1244871/v1), 2022-02-17
Supplement: Supplementary file 2 [file e2ab0cb670330613b4dc4b94.docx]

| AST for N.gonorrhoae | | | | | | | | | | | | | | | | | | | | | |
| --- | --- | --- | --- | --- | --- | --- | --- | --- | --- | --- | --- | --- | --- | --- | --- | --- | --- | --- | --- | --- | --- |
| Pt. ID No | Sex | Ceftriaxone | | | | Azithromycin | | | Ciprofloxacin | | | Cefoxitin | | | | Spectinomycin | | | | | |
| 1 | M | 0.125 |  | |  | 0.75 |  |  | 0.125 |  |  | 2 |  |  | | 32 | |  | |  | |
| 2 | M | 0.25 |  | |  | 0.047 |  |  | 0.25 |  |  | 1.5 |  |  | | 24 | |  | |  | |
| 3 | F | 0.38 |  | |  | 0.093 |  |  | 1.0 |  |  | 1.0 |  |  | | 32 | |  | |  | |
| 4 | M | 0.094 |  | |  | 0.125 |  |  | 0.38 |  |  | 0.75 |  |  | | 16 | |  | |  | |
| 5 | F | 0.25 |  | |  | 0.064 |  |  | 0.50 |  |  | 0.50 |  |  | | 24 | |  | |  | |
| 6 | M | 0. 047 |  | |  | 0.125 |  |  | 0.125 |  |  | 0.25 |  |  | | 24 | |  | |  | |
| 7 | M | 0.125 |  | |  | 0.032 |  |  | 0.25 |  |  | 1.5 |  |  | | 32 | |  | |  | |
| 8 | F | 0.25 |  | |  | 0.094 |  |  | 0.125 |  |  | 0.38 |  | |  | | 16 | |  | |  | |
| 9 | M | 0.032 |  | |  | 0.064 |  |  | 2 |  |  | 0.125 |  | |  | | 32 | |  | |  | |
| 10 | M | 0.25 |  | |  | 0.064 |  |  | 0.047 |  |  | 1.5 |  | |  | | 24 | |  | |  | |
| 11 | M | 0.064 |  | |  | 0.125 |  |  | 0.25 |  |  | 0.75 |  | |  | | 24 | |  | |  | |
| 12 | F | 0.094 |  | |  | 1 |  |  | 3 |  |  | 1.5 |  | |  | | 32 | |  | |  | |
| 13 | F | 0.25 |  | |  | 0.75 |  |  | 0.38 |  |  | 0.50 |  | |  | | 12 | |  | |  | |
| 14 | M | 0.125 |  | |  | 0.50 |  |  | 0.032 |  |  | 1.5 |  | |  | | 24 | |  | |  | |
| 15 | M | 0.047 |  | |  | 2 |  |  | 3 |  |  | 0.75 |  | |  | | 32 | |  | |  | |
| 16 | M | 0.38 |  | |  | 0.094 |  |  | 4 |  |  | 0.125 |  | |  | | 8 | |  | |  | |
| 17 | M | 0.125 |  | |  | 0.047 |  |  | 2 |  |  | 0.38 |  | |  | | 12 | |  | |  | |
| 18 | F | 0.25 |  | |  | 3 |  |  | 0.125 |  |  | 0.25 |  | |  | | 32 | |  | |  | |
| 19 | M | 0.75 |  | |  | 1.0 |  |  | 3 |  |  | 0.25 |  | |  | | 24 | |  | |  | |
| 20 | M | 0.094 |  | |  | 0.75 |  |  | 8 |  |  | 1.5 |  | |  | | 32 | |  | |  | |
| 21 | M | 0.047 |  | |  | 0.50 |  |  | 0.047 |  |  | 0.94 |  | |  | | 32 | |  | |  | |
| 22 | M | 0.25 |  | |  | 0.064 |  |  | 2 |  |  | 0.47 |  | |  | | 16 | |  | |  | |
| 23 | M | 0.125 |  | |  | 2 |  |  | 4 |  |  | 2 |  | |  | | 24 | |  | |  | |
| 24 | M | 0.064 |  | |  | 0.047 |  |  | 3 |  |  | 1.5 |  | |  | | 24 | |  | |  | |
| 25 | M | 0.25 |  | |  | 0.09 |  |  | 0.047 |  |  | 0.125 |  | |  | | 12 | |  | |  | |
| 26 | M | 0.125 |  | |  | 0.50 |  |  | 0.032 |  |  | 0.75 |  | |  | | 32 | |  | |  | |
| 27 | F | 0.094 |  | |  | 2 |  |  | 1.0 |  |  | 3 |  | |  | | 32 | |  | |  | |
| 28 | M | 0.125 |  | |  | 3 |  |  | 0.032 |  |  | 0.25 |  | |  | | 32 | |  | |  | |
| 29 | M | 0.25 |  | |  | 0.094 |  |  | 12 |  |  | 0.32 |  | |  | | 16 | |  | |  | |
| 30 | M | 0.032 |  | |  | 0.032 |  |  | 2 |  |  | 3 |  | |  | | 24 | |  | |  | |
| 31 | M | 0.25 |  | |  | 0.023 |  |  | 0.125 |  |  | 0.50 |  | |  | | 32 | |  | |  | |
| 32 | F | 0.094 |  | |  | 0.047 |  |  | 0.25 |  |  | 0.023 |  | |  | | 8 | |  | |  | |
| 33 | M | 0.047 |  | |  | 0.047 |  |  | 0.032 |  |  | 1.5 |  | |  | | 16 | |  | |  | |
| 34 | M | 0.25 |  | |  | 0.032 |  |  | 0.016 |  |  | 4 |  | |  | | 24 | |  | |  | |
| 35 | M | 0.032 |  | |  | 0.016 |  |  | 0.047 |  |  | 0.75 |  | |  | | 32 | |  | |  | |
| 36 | M | 0.25 |  | |  | 0.125 |  |  | 0.023 |  |  | 0.125 |  | |  | | 24 | |  | |  | |
| 37 | F | 0.25 |  | |  | 2 |  |  | 0.125 |  |  | 0.25 |  | |  | | 24 | |  | |  | |
| 38 | M | 0.064 |  | |  | 0.25 |  |  | 0.25 |  |  | 2 |  | |  | | 16 | |  | |  | |
| 39 | M | 0.38 |  | |  | 1.0 |  |  | 8 |  |  | 0.38 |  | |  | | 32 | |  | |  | |
| 40 | M | 0.25 |  | |  | 0.094 |  |  | 0.5 |  |  | 1.5 |  | |  | | 24 | |  | |  | |
| 41 | M | 0.125 |  | |  | 0.064 |  |  | 3 |  |  | 1.0 |  | |  | | 8 | |  | |  | |
| 42 | M | 0.032 |  | |  | 0.094 |  |  | 0.032 |  |  | 0.094 |  | |  | | 32 | |  | |  | |
| 43 | M | 0.023 |  | |  | 0.50 |  |  | 4 |  |  | 0.064 |  | |  | | 32 | |  | |  | |
| 44 | M | 0.25 |  | |  | 0.016 |  |  | 0.023 |  |  | 0.25 |  | |  | | 24 | |  | |  | |
| 45 | M | 0.047 |  | |  | 0.016 |  |  | 0.25 |  |  | 0.75 |  | |  | | 16 | |  | |  | |
| 46 | F | 0.25 |  | |  | 0.047 |  |  | 12 |  |  | 0.38 |  | |  | | 24 | |  | |  | |
| 47 | M | 0.032 |  | |  | 0.25 |  |  | 0.25 |  |  | 0.125 |  | |  | | 24 | |  | |  | |
| 48 | M | 0.023 |  | |  | 0.032 |  |  | 0.25 |  |  | 1.5 |  | |  | | 32 | |  | |  | |
| 49 | F | 0.016 |  |  | | 0.094 |  |  | 0.38 |  |  | 0.32 |  | |  | | 24 | |  | |  | |
| 50 | M | 0.064 |  |  | | 0.047 |  |  | 0.125 |  |  | 4 |  | |  | | 24 | |  | |  | |
| 51 | M | 0.25 |  |  | | 0.064 |  |  | 4 |  |  | 0.23 |  | |  | | 24 | |  | |  | |
| 52 | F | 0.047 |  |  | | 0.047 |  |  | 1 |  |  | 0.125 |  | |  | | 32 | |  | |  | |
| 53 | M | 0.016 |  |  | | 0.50 |  |  | 0.125 |  |  | 0.75 |  | |  | | 24 | |  | |  | |
| 54 | M | 0.50 |  |  | | 0.047 |  |  | 3 |  |  | 0.38 |  | |  | | 32 | |  | |  | |
| 55 | M | 0.25 |  |  | | 0.125 |  |  | 0.25 |  |  | 1.5 |  | |  | | 32 | |  | |  | |
| 56 | F | 0.25 |  |  | | 0.016 |  |  | 16 |  |  | 0.25 |  | |  | | 24 | |  | |  | |
| 57 | M | 0.094 |  |  | | 0.094 |  |  | 1.0 |  |  | 2 |  | |  | | 24 | |  | |  | |
| 58 | M | 0.25 |  |  | | 1 |  |  | 8 |  |  | 0.50 |  | |  | | 16 | |  | |  | |
| 59 | F | 0.064 |  |  | | 0.25 |  |  | 0.38 |  |  | 0.25 |  | |  | | 32 | |  | |  | |
| 60 | M | 0.38 |  |  | | 0.047 |  |  | 2 |  |  | 0.38 |  | |  | | 24 | |  | |  | |
| 61 | M | 0.047 |  |  | | 0.032 |  |  | 3 |  |  | 0.94 |  | |  | | 12 | |  | |  | |
| 62 | M | 0.25 |  |  | | 0.033 |  |  | 12 |  |  | 0.047 |  | |  | | 24 | |  | |  | |
| 63 | M | 0.032 |  |  | | 0.125 |  |  | 8 |  |  | 0.64 |  | |  | | 8 | |  | |  | |
| 64 | F | 0.25 |  |  | | 0.094 |  |  | 3 |  |  | 1.0 |  | |  | | 24 | |  | |  | |
| 65 | M | 0.094 |  |  | | 0.016 |  |  | 0.38 |  |  | 1.5 |  | |  | | 32 | |  | |  | |
| 66 | M | 0.125 |  |  | | 0.50 |  |  | 4 |  |  | 4 |  | |  | | 4 | |  | |  | |
| 67 | M | 0.064 |  |  | | 1 |  |  | 0.125 |  |  | 3 |  | |  | | 2 | |  | |  | |
| 68 | M | 0.25 |  |  | | 0.25 |  |  | 1 |  |  | 1.5 |  | |  | | 24 | |  | |  | |
| 69 | M | 0.125 |  |  | | 0.32 |  |  | 0.125 |  |  | 0.75 |  | |  | | 32 | |  | |  | |
| 70 | M | 0.047 |  |  | | 0.023 |  |  | 12 |  |  | 0.125 |  | |  | | 16 | |  | |  | |
| 71 | M | 0.25 |  |  | | 0.047 |  |  | 8 |  |  | 0.32 |  | |  | | 8 | |  | |  | |
| 72 | M | 0.125 |  |  | | 0.032 |  |  | 0.25 |  |  | 4 |  | |  | | 24 | |  | |  | |
| 73 | M | 0.023 |  |  | | 0.125 |  |  | 4 |  |  | 2 |  | |  | | 32 | |  | |  | |
| 74 | M | 0.032 |  |  | | 0.50 |  |  | 0.25 |  |  | 1.5 |  | |  | | 24 | |  | |  | |
| 75 | M | 0.023 |  |  | | 0.016 |  |  | 0.5 |  |  | 0.25 |  | |  | | 16 | |  | |  | |
| 76 | F | 0.25 |  |  | | 0.032 |  |  | 2 |  |  | 1.5 |  | |  | | 32 | |  | |  | |
| 77 | M | 0.25 |  |  | | 0.25 |  |  | 1.0 |  |  | 0.094 |  | |  | | 24 | |  | |  | |
| 78 | F | 0.094 |  |  | | 0.50 |  |  | 0.38 |  |  | 0.064 |  | |  | | 12 | |  | |  | |
| 79 | M | 0.25 |  |  | | 0.75 |  |  | 16 |  |  | 1.5 |  | |  | | 24 | |  | |  | |
| 80 | M | 0.064 |  |  | | 0.75 |  |  | 0.125 |  |  | 0.125 |  | |  | | 24 | |  | |  | |
| 81 | M | 0.023 |  |  | | 0.094 |  |  | 0.25 |  |  | 2 |  | |  | | 32 | |  | |  | |
| 82 | M | 1.0 |  |  | | 0.064 |  |  | 4 |  |  | 3 |  | |  | | 32 | |  | |  | |
| 83 | M | 0.25 |  |  | | 0.047 |  |  | 0.50 |  |  | 1.5 |  | |  | | 32 | |  | |  | |
| 84 | M | 0.125 |  |  | | 0.50 |  |  | 0.38 |  |  | 0.25 |  | |  | | 24 | |  | |  | |
| 85 | F | 0,064 |  |  | | 0.094 |  |  | 0.25 |  |  | 0.75 |  | |  | | 12 | |  | |  | |
| 86 | M | 0.094 |  |  | | 0.75 |  |  | 0.047 |  |  | 0.32 |  | |  | | 8 | |  | |  | |
| 87 | M | 0.25 |  |  | | 1 |  |  | 0.25 |  |  | 1.5 |  | |  | | 4 | |  | |  | |
| 88 | F | 0.064 |  |  | | 0.032 |  |  | 3 |  |  | 0.25 |  | |  | | 24 | |  | |  | |
| 89 | M | 0.25 |  |  | | 0.064 |  |  | 0.38 |  |  | 0.38 |  | |  | | 24 | |  | |  | |
| 90 | M | 0.023 |  |  | | 0.016 |  |  | 2 |  |  | 0.75 |  | |  | | 32 | |  | |  | |
| 91 | M | 0.064 |  |  | | 0.023 |  |  | 0.047 |  |  | 2 |  | |  | | 16 | |  | |  | |
| 92 | M | 0.023 |  |  | | 0.047 |  |  | 0.25 |  |  | 1.5 |  | |  | | 2 | |  | |  | |
| 93 | M | 0.25 |  |  | | 0.016 |  |  | 0.38 |  |  | 0.38 |  | |  | | 24 | |  | |  | |
| 94 | M | 0.25 |  |  | | 0.50 |  |  | 8 |  |  | 0.125 |  | |  | | 24 | |  | |  | |
| 95 | F | 0.94 |  |  | | 0.75 |  |  | 2 |  |  | 0.50 |  | |  | | 32 | |  | |  | |
| 96 | M | 0.032 |  |  | | 0.047 |  |  | 0.125 |  |  | 1.0 |  | |  | | 12 | |  | |  | |
| 97 | F | 0.023 |  |  | | 0.75 |  |  | 3 |  |  | 1.5 |  | |  | | 8 | |  | |  | |
| 98 | M | 0.25 |  |  | | 0.064 |  |  | 0.125 |  |  | 0.64 |  | |  | | 3 | |  | |  | |
| 99 | M | 0.094 |  |  | | 0.75 |  |  | 0.38 |  |  | 1.5 |  | |  | | 32 | |  | |  | |
| 100 | M | 0.25 |  |  | | 0.50 |  |  | 0.38 |  |  | 0.032 |  | |  | | 24 | |  | |  | |
| 101 | M | 0.25 |  |  | | 0.032 |  |  | 0.047 |  |  | 0.94 |  | |  | | 16 | |  | |  | |
| 102 | M | 0.125 |  |  | | 0.016 |  |  | 8 |  |  | 0.125 |  | |  | | 16 | |  | |  | |
| 103 | M | 0.064 |  |  | | 0.094 |  |  | 0.125 |  |  | 0.064 |  | |  | | 3 | |  | |  | |
| 104 | M | 0.125 |  |  | | 0.50 |  |  | 0.032 |  |  | 1.5 |  | |  | | 8 | |  | |  | |
| 105 | F | 0.25 |  |  | | 0.047 |  |  | 3 |  |  | 1.0 |  | |  | | 24 | |  | |  | |
| 106 | M | 0.023 |  |  | | 0.50 |  |  | 0.25 |  |  | 0.75 |  | |  | | 4 | |  | |  | |
| 107 | M | 0.25 |  |  | | 1.0 |  |  | 0.38 |  |  | 0.125 |  | |  | | 32 | |  | |  | |
| 108 | M | 0.094 |  |  | | 0.047 |  |  | 2 |  |  | 1.5 |  | |  | | 32 | |  | |  | |
| 109 | F | 0.032 |  |  | | 0.032 |  |  | 0.023 |  |  | 1.0 |  | |  | | 24 | |  | |  | |
| 110 | M | 0.064 |  |  | | 0.064 |  |  | 0.50 |  |  | 0.38 |  | |  | | 8 | |  | |  | |
| 111 | M | 0.25 |  |  | | 0.047 |  |  | 0.125 |  |  | 0.50 |  | |  | | 32 | |  | |  | |
| 112 | M | 0.25 |  |  | | 0.50 |  |  | 0.125 |  |  | 1.5 |  | |  | | 24 | |  | |  | |
| 113 | F | 0.034 |  |  | | 0.064 |  |  | 0.047 |  |  | 2 |  | |  | | 32 | |  | |  | |
| 114 | M | 0.023 |  |  | | 0.50 |  |  | 0.38 |  |  | 0.75 |  | |  | | 32 | |  | |  | |
| 115 | M | 0.047 |  |  | | 0.032 |  |  | 0.25 |  |  | 1.5 |  | |  | | 24 | |  | |  | |
| 116 | M | 0.25 |  |  | | 0,25 |  |  | 1.0 |  |  | 0.125 |  | |  | | 12 | |  | |  | |
| 117 | F | 0.25 |  |  | | 0.094 |  |  | 0.125 |  |  | 0.38 |  | |  | | 4 | |  | |  | |
| 118 | M | 0.094 |  |  | | 0.125 |  |  | 0.047 |  |  | 0.094 |  | |  | | 24 | |  | |  | |
| 119 | M | 0.125 |  |  | | 0.064 |  |  | 0.125 |  |  | 1.0 |  | |  | | 3 | |  | |  | |
| 120 | M | 0.094 |  |  | | 0.50 |  |  | 0.25 |  |  | 0.75 |  | |  | | 32 | |  | |  | |
| 121 | M | 0.25 |  |  | | 0.094 |  |  | 0.38 |  |  | 0.50 |  | |  | | 12 | |  | |  | |
| 122 | M | 0.25 |  |  | | 1 |  |  | 0.50 |  |  | 1.5 |  | |  | | 8 | |  | |  | |
| 123 | M | 0.047 |  |  | | 0.50 |  |  | 12 |  |  | 2 |  | |  | | 2 | |  | |  | |
| 124 | M | 0.25 |  |  | | 0.047 |  |  | 0.032 |  |  | 0.094 |  | |  | | 4 | |  | |  | |
| 125 | F | 0.125 |  |  | | 0.032 |  |  | 0.023 |  |  | 0.125 |  | |  | | 24 | |  | |  | |
| 126 | M | 0.023 |  |  | | 0.016 |  |  | 0.047 |  |  | 1.5 |  | |  | | 32 | |  | |  | |
| 127 | M | 0.064 |  |  | | 0.50 |  |  | 0.25 |  |  | 0.25 |  | |  | | 8 | |  | |  | |
| 128 | F | 0.25 |  |  | | 0.023 |  |  | 0.032 |  |  | 0.125 |  | |  | | 24 | |  | |  | |
| 129 | M | 0.25 |  |  | | 0.032 |  |  | 0.047 |  |  | 1.5 |  | |  | | 24 | |  | |  | |
| 130 | F | 0.25 |  |  | | 0.094 |  |  | 0.47 |  |  | 1.5 |  | |  | | 16 | |  | |  | |
| 131 | M | 0.064 |  |  | | 0.75 |  |  | 0.032 |  |  | 0.064 |  | |  | | 24 | |  | |  | |
| 132 | M | 0.047 |  |  | | 0.25 |  |  | 8 |  |  | 0.75 |  | |  | | 2 | |  | |  | |
| 133 | M | 0.094 |  |  | | 0.016 |  |  | 0.125 |  |  | 0.38 |  | |  | | 8 | |  | |  | |
| 134 | F | 0.125 |  |  | | 0.023 |  |  | 0.25 |  |  | 0.047 |  | |  | | 16 | |  | |  | |
| 135 | M | 0.25 |  |  | | 0.016 |  |  | 0.38 |  |  | 1.5 |  | |  | | 32 | |  | |  | |
| 136 | M | 0.023 |  |  | | 0.094 |  |  | 0.50 |  |  | 2 |  | |  | | 16 | |  | |  | |
| 137 | M | 0.032 |  |  | | 0.75 |  |  | 0.50 |  |  | 0.38 |  | |  | | 24 | |  | |  | |
| 138 | F | 0.25 |  |  | | 0.047 |  |  | 0.38 |  |  | 0.125 |  | |  | | 24 | |  | |  | |
| 139 | M | 0.023 |  |  | | 0.016 |  |  | 0.023 |  |  | 1.0 |  | |  | | 32 | |  | |  | |
| 140 | M | 0.016 |  |  | | 0.094 |  |  | 0.25 |  |  | 0.50 |  | |  | | 24 | |  | |  | |
| 141 | F | 0.25 |  |  | | 0.125 |  |  | 0.032 |  |  | 0.25 |  | |  | | 24 | |  | |  | |
| 142 | M | 0.032 |  |  | | 0.094 |  |  | 3 |  |  | 0.032 |  | |  | | 32 | |  | |  | |
| 143 | M | 0.064 |  |  | | 0.25 |  |  | 0.125 |  |  | 0.23 |  | |  | | 12 | |  | |  | |
| 144 | M | 0.023 |  |  | | 0.016 |  |  | 0.38 |  |  | 1.5 |  | |  | | 16 | |  | |  | |
| 145 | M | 0.25 |  |  | | 0.38 |  |  | 0.047 |  |  | 0.25 |  | |  | | 24 | |  | |  | |
| 146 | M | 0.125 |  |  | | 1 |  |  | 1 |  |  | 0.75 |  | |  | | 24 | |  | |  | |
| 147 | F | 0.047 |  |  | | 0.75 |  |  | 0.016 |  |  | 0.38 |  | |  | | 4 | |  | |  | |
| 148 | M | 0.047 |  |  | | 0.50 |  |  | 0.38 |  |  | 0.094 |  | |  | | 32 | |  | |  | |
| 149 | M | 0.094 |  |  | | 0.064 |  |  | 0.25 |  |  | 1.0 |  | |  | | 24 | |  | |  | |
| 150 | M | 1.0 |  |  | | 0.75 |  |  | 0.125 |  |  | 0.75 |  | |  | | 166 | |  | |  | |
| 151 | F | 0.25 |  |  | | 0.38 |  |  | 0.38 |  |  | 0.125 |  | |  | | 32 | |  | |  | |
| 152 | M | 0.094 |  |  | | 0.38 |  |  | 0.38 |  |  | 0.094 |  | |  | | 32 | |  | |  | |
| 153 | M | 0.023 |  |  | | 1 |  |  | 2 |  |  | 2 |  | |  | | 24 | |  | |  | |
| 154 | M | 0.25 |  |  | | 0.50 |  |  | 0.25 |  |  | 0.25 |  | |  | | 24 | |  | |  | |
| 155 | M | 0.047 |  |  | | 0.75 |  |  | 0.0475 |  |  | 1.5 |  | |  | | 8 | |  | |  | |
| 156 | M | 0.125 |  |  | | 125 |  |  | 0.032 |  |  | 0.064 |  | |  | | 16 | |  | |  | |
| 157 | M | 0.25 |  |  | | 0.094 |  |  | 0.25 |  |  | 0.75 |  | |  | | 32 | |  | |  | |
| 158 | F | 0.125 |  |  | | 0.047 |  |  | 0.032 |  |  | 1.5 |  | |  | | 8 | |  | |  | |
| 159 | M | 0.094 |  |  | | 0.032 |  |  | 0.38 |  |  | 0.25 |  | |  | | 8 | |  | |  | |
| 160 | F | 0.047 |  |  | | 0.75 |  |  | 0.38 |  |  | 0.50 |  | |  | | 24 | |  | |  | |
| 161 | F | 0.25 |  |  | | 0.032 |  |  | 0.023 |  |  | 0.125 |  | |  | | 32 | |  | |  | |
| 162 | M | 0.25 |  |  | | 0.064 |  |  | 0.38 |  |  | 1.5 |  | |  | | 32 | |  | |  | |
| 163 | M | 0.125 |  |  | | 0.25 |  |  | 0.032 |  |  | 0.50 |  | |  | | 24 | |  | |  | |
